1 **Title**

2 Implementation of digital chest radiography for childhood tuberculosis diagnosis at  
3 district hospital level in six high tuberculosis burden and resources limited countries.

4 **Short title:**

5 Implementation of digital chest radiography

6 **Authors**

7 Bernard Fortune Melingui<sup>1</sup>, Basant Joshi<sup>2</sup>, Jean-Voisin Taguebue<sup>3</sup>, Douglas Mbang Massom<sup>4</sup>,  
8 Etienne Leroy Terquem<sup>5</sup>, Pierre-Yves Norval<sup>6</sup>, Angelica Salomao<sup>7</sup>, Dim Bunnet<sup>8</sup>, Tek Chhen  
9 Eap<sup>9</sup>, Laurence Borand<sup>8,10</sup>, Celso Khosa<sup>11</sup>, Raoul Moh<sup>12</sup>, Juliet Mwanga-Amumpere<sup>13</sup>, Mao  
10 Tan Eang<sup>14</sup>, Ivan Manhiça<sup>15</sup>, Ayeshatu Mustapha<sup>16</sup>, Eric Balestre<sup>2</sup>, Samuel Beneteau<sup>1</sup>, Eric  
11 Wobudeya<sup>17</sup>, Olivier Marcy<sup>2</sup>, Joanna Orne-Gliemann<sup>2</sup> and Maryline Bonnet<sup>1</sup>, On behalf of the  
12 TB-Speed Decentralization study group.

13 **Affiliations**

14 <sup>1</sup>Translational Research on HIV and Endemic and Emerging Infectious Diseases  
15 (TransVIHMI), University of Montpellier, National Institute for Health and Medical Research  
16 (INSERM), French National Research Institute for Sustainable Development (IRD),  
17 Montpellier, France.

18 <sup>2</sup> National Institute for Health and Medical Research (INSERM) U 1219, French National  
19 Research Institute for Sustainable Development (IRD), University of Bordeaux, Bordeaux  
20 Population Health Centre, Bordeaux, France.

21 <sup>3</sup> Mother and Child Center, Chantal Biya Foundation, Yaounde, Cameroon

22 <sup>4</sup> Faculty of Medicine and Pharmaceutical Science, University of Douala, Cameroon

23 <sup>5</sup> François Quesnay Hospital - International Pulmonology Support, Mantes la Jolie, France

24 <sup>6</sup> Technical Assistance for Management (TeAM), Paris, France

25 <sup>7</sup> Independent Public Health Consultant, Maputo, Mozambique

26 <sup>8</sup> Pasteur Institute of Cambodia, Epidemiology and Public Health Unit, Phnom Penh, Cambodia

27 <sup>9</sup> Ministry of Public Health, National Tuberculosis Program, Phnom Penh, Cambodia

28 <sup>10</sup> Division of Infectious Diseases, Johns Hopkins University School of Medicine, Baltimore,  
29 MD USA

30 <sup>11</sup> Instituto Nacional de Saúde, Centro de Investigação e Treino em Saúde da Polana Caniço,  
31 Marracuene, Mozambique

32 <sup>12</sup> CHU de Treichville, Abidjan, Côte d'Ivoire

33 <sup>13</sup> Epicentre Mbarara Research Centre, Mbarara, Uganda

NOTE: This preprint reports new research that has not been certified by peer review and should not be used to guide clinical practice.

34 <sup>14</sup> Ministry of Health, National Center for Tuberculosis and Leprosy (CENAT/NTP), Phnom  
35 Penh, Cambodia

36 <sup>15</sup> Ministério da Saúde, Programa Nacional de Controlo da Tuberculose, Maputo,  
37 Mozambique

38 <sup>16</sup> Ola During Children Hospital, Freetown, Sierra Leone

39 <sup>17</sup> MU-JHU Care Ltd, MU-JHU Research Collaboration, Kampala, Uganda

40

41

42 **Corresponding author**

43 Bernard Fortune MELINGUI

44 Translational Research on HIV and Endemic and Emerging Infectious Diseases  
45 (TransVIHMI), University of Montpellier, National Institute for Health and Medical  
46 Research (INSERM), French National Research Institute for Sustainable Development  
47 (IRD), Montpellier, France

48 911 avenue Agropolis, 34394 Montpellier cedex 5, France

49 [bernard.melingui@ird.fr](mailto:bernard.melingui@ird.fr)

50 Tel: +33 (0)7 72 26 22 66

51

52

53

54

55

56 **Abstract**

57 **Objectives**

58 Chest X-ray (CXR) plays an important role in childhood tuberculosis (TB) diagnosis but  
59 access to quality CXR remains a major challenge in resource-limited settings. Digital  
60 CXR (d-CXR) can solve some image quality issues and facilitate their transfer for  
61 quality control. We describe the implementation of introducing d-CXR in twelve district  
62 hospitals (DH) in 2021-22 across Cambodia, Cameroon, Ivory Coast, Mozambique,  
63 Sierra Leone and Uganda as part of the TB-Speed decentralization study on childhood  
64 tuberculosis diagnosis.

65 **Methods**

66 For digitization of CXR Digital Radiography (DR) plates was set-up on existing  
67 analogue radiography machines. D-CXR were transferred to an international server at  
68 Bordeaux University and downloaded by sites' clinicians for interpretation. We  
69 assessed the pre-intervention (baseline situation and d-CXR set-up) and per-  
70 intervention (uptake, challenges and health care workers' (HCW) perceptions) of d-  
71 CXR implementation. We used a convergent mixed method approach utilizing process  
72 data, individual interviews with 113 HCWs involved in performing or interpreting d-  
73 CXRs and site support supervision reports.

74 **Results**

75 Of 3104 children with presumptive TB, 1642 (52.9%) had at least one d-CXR including  
76 1505, 136 and 1 children with one, two and three d-CXR respectively, resulting in a  
77 total of 1780 d-CXR. Of them, 1773 (99.6%) were of good quality and 1772/1773  
78 (99.9%) were interpreted by sites' clinicians. 164 children had no d-CXR performed  
79 despite attending the radiography department: 126, 37 and 1 with one, two and three  
80 attempts, respectively. D-CXRs were not performed in 21.6% (44/203) due to  
81 connectivity problem between the DR plate captor and the computer. HCWs reported  
82 good perceptions of d-CXR and of the DR plates provided. The main challenge was  
83 the upload to and download from the server of d-CXRs, due to limited internet access.

84 **Conclusion**

85 D-CXR using DR plates was feasible at district hospital level and provided good quality  
86 images but required overcoming operational challenges.

87

88 **Keywords:** children; tuberculosis; digital chest X-ray; resources limited countries;  
89 implementation.

90

## 91 INTRODUCTION

92 Tuberculosis (TB) is one of the leading infectious causes of death worldwide in children  
93 with 183 000 deaths in 2022 (1). Modelling suggest that more than 95% of these  
94 children were not treated hence likely not diagnosed at the time of death (2).

95 Microbiological confirmation of childhood TB is difficult due to challenges in obtaining  
96 respiratory samples in young children and the paucibacillary nature of TB in children  
97 resulting in low sensitivity of bacteriological tests from respiratory samples (3,4).  
98 Consequently, the majority of children are clinically diagnosed for TB, mainly based on  
99 clinical evaluation and chest X-ray (CXR) findings (5). CXR plays a critical place in the  
100 recent treatment decision algorithm proposed by WHO for tuberculosis in children  
101 (6,7).

102 In high TB burden and limited resources countries, the use of CXR faces several  
103 difficulties: i) radiology services are often only available in district or regional hospitals  
104 (8), hence requiring referral for CXR of children with presumptive TB seen at Primary  
105 Health Centres (PHC), inducing additional transport costs and affecting access to  
106 CXR; ii) clinicians lack training in interpreting CXR for paediatric TB diagnosis,  
107 especially at peripheral healthcare facilities affecting the reliability of CXR results; and  
108 iii) films and reagents for analogue X-ray machines often suffer from shortage and  
109 expiries, leading to poor CXR quality (9).

110 Digital CXR (d-CXR) could contribute to improving the quality of CXR interpretation in  
111 resource-limited settings by overcoming the issue of shortage and poor quality films  
112 and reagents (10). D-CXR could also allow remote interpretation for advice or external  
113 reading for quality control purpose or advice. In addition, digital technologies can  
114 enable future use of computer aid detection (CAD) for TB, already validated for adults,  
115 and under evaluation in children (11). The implementation of d-CXR for childhood TB  
116 diagnosis has been poorly documented in resource-limited settings. Documenting and  
117 learning from the challenges and solutions found in operational settings is essential to  
118 inform implementers and decision makers on the use of d-CXR at lower levels of care.  
119 Using the experience of the TB-Speed decentralization study, we described the  
120 implementation of d-CXR in 12 DHs of six high TB incidence and resource-limited  
121 settings.

122

123

## 124 **METHODS**

### 125 **Study setting**

126 The TB-Speed decentralization study was an operational research to assess the effect  
127 of implementing a comprehensive diagnostic approach on paediatric TB case detection  
128 at DH and PHC levels. The approach included symptomatic TB screening of all sick  
129 children (<15 years) arriving at the health facility to identify children with presumptive  
130 TB, clinical evaluation for all children with presumptive TB, microbiological testing  
131 using Xpert MTB/RIF Ultra on a nasopharyngeal aspirate (NPA) and a stool or sputum  
132 sample, and d-CXR. The study was implemented in two rural or semi-rural health  
133 districts in Cambodia, Cameroon, Ivory Coast, Mozambique, Sierra Leone and  
134 Uganda (12)). In one district, the DH implemented the diagnosis approach, while PHCs  
135 only referred children identified with presumptive tuberculosis to DH after screening. In  
136 the other district both the DH and PHCs implemented the diagnosis approach, except  
137 for CXR that was available at DH only. The study comprised an observation period to  
138 document baseline situation followed by a lead-in phase to set-up and build capacity  
139 (pre-intervention), and a 12 months of intervention period (per-intervention).

140

### 141 **Digital radiography set up and supervision**

142 For DH without existing digital CXR system, analogue radiographies were equipped  
143 with digital radiography (DR) plates (Agfa DR14eC, AGFA N.V, France), which  
144 produces a digital radiographic image instantly on a computer. For DH without  
145 functional radiography, a portable radiography was provided. Sites received support to  
146 strengthen internet connexion if needed and to reinforce protective measures when  
147 necessary. Sites' radiographers were trained on how to convert Digital Imaging and  
148 Communication in Medicine (DICOM) images' format into Joint Photographic Experts  
149 Group (JPEG) format and to upload them on the international FTPS (File Transfer  
150 Protocol Secure) server at the University of Bordeaux (France). Sites' clinicians and  
151 radiographers were trained on how to download d-CXR images on tablets for  
152 interpretation and on assessing the quality of CXR using standardised criteria as part  
153 of a 1.5-day training course (13). CXR were performed using antero-posterior and  
154 lateral CXR for children younger than 5 years and postero-anterior CXR for children  
155 older than 5 years. If a CXR was assessed as uninterpretable due to poor quality,

156 another CXR was performed immediately. The interpretation was recorded by readers  
157 in an electronic Case Report Form (CRF) data on REDCap clinical database on tablets.  
158 Support supervision activities were implemented to support field implementation of the  
159 diagnostic approach including CXR with visits conducted by representative of national  
160 TB programs (NTP), paediatricians and study country coordinators, guided by a  
161 standardised support supervision tool documenting both quantitative and qualitative  
162 data related to performance, challenges observed and/or discussed and immediate  
163 actions taken or recommendations made for further action.

164

### 165 **Implementation study design and population**

166 Within the TB-Speed Decentralization study, we conducted a broad implementation  
167 research programme, using a convergent mixed methods design. The pre-intervention  
168 component of the implementation of d-CXR relied on baseline X-ray capacity and setup  
169 data, and the per-intervention component on process data, individual interviews data  
170 and support supervision data. Qualitative and quantitative baseline capacity and setup  
171 data were retrieved from baseline assessment forms and from country implementation  
172 guide, respectively. Quantitative process data were obtained from the clinical database  
173 for children with presumptive TB enrolled in the TB-Speed Decentralization study.  
174 These children were recruited between August 2019 and September 2021. Qualitative  
175 interviews were conducted among HCWs who were either directly involved in  
176 performing the d-CXR (radiographers), and/or who read and interpreted images  
177 (medical doctors, nurses) and/or who took part in other components of the diagnosis  
178 approach, such as screening, and observed the d- CXR process (midwives and  
179 paramedics). Support supervision quantitative and qualitative data was retrieved from  
180 site supervision reports.

181

### 182 **Outcomes**

#### 183 *Pre-intervention*

184 Pre intervention d-CXR implementation outcomes consisted first in baseline  
185 radiography capacity in each DH: availability of an X-Ray unit with X-ray protection,  
186 functional analogue X-ray machine, availability of digital X-Ray, stabilising and back-  
187 up systems for electricity and number of radiographers (14). Other outcome related to  
188 the level of capacity strengthening for the d-CXR setup in terms of renovation of the X-

189 ray unit, number and type of equipment provided, additional logistic support with  
190 electricity and number of radiographers trained for equipment use (Table 1).

191

### 192 *Per-intervention*

193 Per intervention d-CXR implementation outcomes included process outcomes,  
194 supervision outcomes and individual experiences and perceptions. Process outcomes  
195 included the uptake of d-CXR assessed by the cascade of care from the CXR  
196 prescription to its interpretation: 1) number of children with i) presumptive TB, ii) at  
197 least one d-CXR performed (one, two and three d-CXR performed), iii) any CXR  
198 attempts (visit to X-ray department) but without d-CXR performed (one, two and three  
199 attempts); 2) number of d-CXR i) performed, ii) of good quality defined as readable,  
200 and iii) interpreted; 3) reasons for not performing a d-CXR presented per category as  
201 recorded by sites' clinicians including: technical problems with X-ray machine,  
202 connectivity problem between the DR plate detector and the computer, electrical  
203 problems, absence of radiographer, administrative reason and non-specified technical  
204 issues. Supervision outcomes assessed performance of CXR services by supervisors,  
205 through 3 quantitative indicators: 1) d-CXRs performed as prescribed, assessed by the  
206 availability of a d-CXR images for children with presumptive TB at the DH in the last 2  
207 weeks; 2) Upload and download of d-CXR images, assessed by the ability of the site  
208 radiographer and site reader to upload and download d-CXR image; 3) d-CXRs  
209 interpretation, assessed by the presence of at least two d-CXR interpretation reports  
210 from the last 2 weeks. Performance outcomes were scored using a Likert scale as  
211 follows; 1- Never: The task is not done completely; 2- Rarely: Performance of task is  
212 below average; 3- Sometimes: Performance of task is average; 4- Often: Performance  
213 of task is above average; 5- Always. Supervision outcomes included also action taken  
214 and recommendations following supervision visits. Individual HCWs' experiences and  
215 perception of d-CXR included operational challenges and contextual conditions that  
216 made d-CXR possible or not (15).

217

### 218 **Data collection and analysis**

219 Pre-intervention implementation data was collected between January and June 2018  
220 from paper-based standardised baseline assessment forms, filled by country  
221 investigators and entered in an Excel database. Setup data was collected between



222 May and December 2019 from the International Project Manager's activity monitoring  
223 file including country implementation guides.

224 For the per-intervention implementation data, quantitative process data were  
225 computed from real-time patient level individual data, collected during study  
226 intervention for enrolled children by site HCW assigned to the study and directly  
227 entered into an electronic CRF. Process outcomes are presented as counts,  
228 proportions, medians and interquartile ranges (IQR). Paper-based site supervision  
229 reports were entered into a REDCap dedicated database by research assistants. We  
230 calculated the median scores' and IQR for the three CXR outcomes.

231 All quantitative data were analysed with the R software (version 4.2.1, R Foundation  
232 for Statistical Computing).

233 Regarding per-intervention implementation qualitative data, reasons for d-CXR not  
234 performed were retrieved from the REDCap clinical database. Supervision visits  
235 qualitative notes made by supervisors were extracted from site supervision reports and  
236 entered as free text into the REDCap supervision database. Challenges to perform d-  
237 CXR and mitigations strategies were grouped into global deductive thematic categories  
238 respectively.

239 Individual interviews were conducted by trained social science research assistants  
240 using a semi-structured guide, between June and August 2021. Interviews aimed at  
241 investigating overall experiences and perceptions of the childhood TB diagnosis  
242 approach (16), and for this paper we analyzed data related to d-CXR process. Among  
243 the 113 HCWs interviewed, median age was 36 years (IQR; 31, 41) and 64 (57%) were  
244 female. More than half of the HCWs interviewed were nurses (Table S1). Interviews  
245 were conducted face-to-face or by telephone (when transportation to the site was not  
246 possible due to COVID-19 restrictions) and were recorded if respondents permitted.  
247 Qualitative data were anonymised using numerical identification codes. A thematic  
248 analysis was performed in three steps: we first developed a codebook based on the  
249 themes that were predefined by the semi-structured interview guides. We then coded  
250 the data using the Nvivo release qualitative data management software, QSR  
251 International Private Ltd. Version 1.5, 2021. Recurring themes were identified and  
252 grouped into overarching thematic categories related to d-CXR, and later on  
253 summarized.

254

255 **Ethics statement**

256 This study was approved by each implementing country's National Ethics Committees,  
257 the WHO Ethical Review Board, and the National Institute of Health and Medical  
258 Research (INSERM Ethics Evaluation Committee. Individual consent was obtained  
259 from Parents/Guardians of enrolled children and the child's assent was obtained when  
260 the child was old enough as per countries regulation and from interviewed HCWs.

261 **RESULTS**

262 ***Pre-intervention implementation of d-CXR***

263 As per the baseline DH capacity assessment, 10/12 (83%) DH had an X-ray  
264 department and an analogue X-ray machine. Only 1 out of 12 DH already had a digital  
265 X-ray (Bo Government referral hospital from Sierra Leone). Electrical power instability  
266 and cuts were reported in Cambodia, Cameroon, Cote d'Ivoire and Mozambique. In all  
267 radiology departments, at least one radiographer was available to perform CXR (Table  
268 2).

269 Regarding d-CXR set-up, in Uganda, in both DH, the X-ray department was renovated  
270 with the installation of lead doors and analogic X-ray machine was provided. DR plates  
271 was set-up on existing analogue radiography machines in 11 DH. One focal person  
272 from each country received an online training in setting up and using DR-plates by the  
273 manufacturer's team in order to train radiographers at DH. All DH had at least 2  
274 radiographers trained except in Rakai (Uganda) that had only one radiographer.  
275 Tablets, internet connectivity and electrical stabilisers were provided to all facilities  
276 (Table 2).

277 ***Per-intervention implementation of d-CXR***

278 ***Process and performance indicators of d-CXR***

279 Of 3104 children with presumptive TB, 1642 (52.9%) had at least one d-CXR  
280 performed, of which 1505, 136 and 1 children had one, two and three d-CXR performed  
281 respectively, giving a total of 1780 d-CXR. Of them, 1773 (99.6%) were of good quality,  
282 and 1772/1773 (99.9%) were interpreted (Table 3).

283 A total of 46 sites supervision visits were performed in DH. The median score of the  
284 performance indicator assessing if d-CXR were performed as indicated was 5 in all  
285 countries, except Mozambique where it was 1. The median score regarding the

286 process of loading of the d-CXR images was 1 in Mozambique and in Uganda, and the  
287 median score for the d-CXR interpretation indicator was 4 to 5 in all countries, except  
288 in Mozambique where it was 1 (Table 4).

289 *HCWs' perception, operational challenges and mitigation actions*

290 HCWs interviewed valued the digital equipment provided, its technical features, the  
291 quality of images taken, and thereby being able to provide quality care to patients.

292 *“What is working well is that, there are many ways it can be answered. The*  
293 *x-ray machine itself, because it gives services to different people, other*  
294 *patients and specifically the TB Speed children. Also, the imaging system*  
295 *what we call the DR system is also working well (...) It's a sophisticated*  
296 *good machine.” (Uganda, Radiographer).*

297 HCWs were happy with the quality of d-CXR they received. Very few reported issues  
298 on quality requiring to repeat the d-CXR.

299 *“Technique of radiography is better though we follow up, we read the film x-*  
300 *ray through TB speed, most films have acceptable good quality.”*  
301 *(Cambodia, Nurse).*

302 Some HCWs regretted the absence of printed X-rays when using d-CXR. They  
303 suggested that printed X-rays would be more easily accessible for HCWs for  
304 interpretation and would create more opportunities for learning among HCWs.

305 *“Now, the chest x-ray they don't produce film, yes after the x-ray, the doctor*  
306 *will go there and interpret the x-ray so I don't have too have idea over it*  
307 *because I have not been there with the doctor to do the interpretation of the*  
308 *x-ray” (Sierra Leone, Nurse).*

309 Regarding challenges, among reasons for not performing d-CXR reported in the  
310 clinical database, 44/203 (21.7%) were due to connectivity problem between the DR  
311 plate detector and the computer and 30 (14.8%) to electrical problems (Table 5).  
312 Difficulties in loading the d-CXR images, technical problems with the DR-plate and  
313 issues with internet connexion were also reported as common challenges in the  
314 supervision reports. During HCWs' interviews, ensuring stable electricity was overall  
315 reported as one of the main challenges for d-CXR, occasionally resulting in system  
316 errors while performing X-ray due to the interruption of the internet connection. This  
317 often requires additional cost for the parents who need to come back the next day.

318 *I: What do you do then for example, child is coming and the electricity is off*  
319 *the whole day?*

320 *R: I usually ask them whether they have, relatives close by where they can*  
321 *sleep so that the next day I take the x-ray. In any case, if they go back for*  
322 *them to come back it costs a lot to the client and TB Speed, if I ask and they*  
323 *have somewhere to sleep, then that is to their advantage of the parent. If*  
324 *they don't have, I may admit them temporarily but if they cannot afford then*  
325 *they go back and choose another day to come back. (Uganda,*  
326 *Radiographer).*

327 To mitigate the problems of internet, HCWs from DH often came to the radiography  
328 department to directly read the d-CXRs on the monitor. Refresher training of loading  
329 d-CXR, use of social media or platforms were recommended by supervisors to mitigate  
330 the problems of loading of the d-CXR images (Table S2). During HCWs' interview,  
331 using social media tools for exchange d-CXR images or wireless telecommunication  
332 system were proposed as a mitigation action to the challenges with the loading of the  
333 image.

334 *“Regarding result, we have system like Telegram, for me, I don't have it but*  
335 *other staffs they have, my boss, and CXR film interpreter; for us, we don't*  
336 *know how to interpret CXR. (Cambodia, Midwife)*

337 Many of the challenges raised by HCWs were not directly related to digitalization but  
338 to the X-ray machine breakdown, human resources' absence and turn over, access  
339 issues (Table 5).

340 *“The challenge is mainly around the distance and transport.....But in*  
341 *most cases, the clients say they don't have money to reach the hospital.*  
342 *.....” (Uganda, Nurse).*

343 *We have lost many patients because the patient will say I don't have money to*  
344 *do the X-ray. (Sierra Leone, medical doctor).*

345

## 346 **DISCUSSION**

347 This study reports experience of implementing d-CXR for diagnosis of TB in children  
348 in high TB incidence and resource-limited countries at district level. Overall, the use of  
349 d-CXR resulted in a very high proportion of good quality CXR and this quality was very  
350 much appreciated by HCWs. These results show also the efforts required in terms of

351 equipment, training and supervision to setup d-CXR at DH level and highlight the  
352 challenges faced during implementation and mitigation actions proposed by the end-  
353 users and the supervisors.

354 In term of site readiness, in our study settings, only 1 out of 12 district hospitals in six  
355 countries already had digital X-ray, reflecting the low coverage of digital X-rays in  
356 resource-limited countries at DH levels. Although not representative of DHs in all  
357 resource limited countries, pre-intervention findings highlight the level of investment  
358 and support that would be required for countries to setup digital X-ray at this level of  
359 health facility. However, this situation is expected to improve in the coming years with  
360 the introduction of mobile radiography and digital X-rays in the new Global Fund  
361 requests to increase access to radiography and ease the use of CAD currently  
362 recommended for TB screening in adults and under evaluation for diagnosis in children  
363 (17).

364 Regarding the challenges of using the d-CXR, the problems of connectivity between  
365 the DR plates captors and the computer was a common reason for the failure of d-  
366 CXR. The DR plates used in the study were chosen because of their rapidity between  
367 exposure and image acquisition but had the disadvantage of having fragile DR plate  
368 detector that could not support shocks and high temperatures, which may explain the  
369 dysfunctionalities. Manufacturers should consider designing less fragile sensors for  
370 markets of resource limited countries.

371 Even under study conditions, the process of loading images was challenging. This  
372 process can be complex and require good training and supervision as highlighted in  
373 the site supervision reports and good quality of the internet connection. Despite the  
374 providing of internet connection system to all DH during the d-CXR setup, several sites  
375 suffered from recurrent internet connection problems. To mitigate these issues, HCWs  
376 from DH had to come to the X-ray department to read the CXR on the monitor and  
377 others were using social medial tools for d-CXR exchange. This last solution is raising  
378 potential ethical issues related to the safeguarding of files and to the confidentiality in  
379 regards to the regulations in each country. Thus, when implementing digital X-ray,  
380 access rights, and handling of personal data should be organized using state of the art  
381 procedures such as encryption security, pseudonymisation and logging (18–20)

382 Another important challenge affecting the use of DR-plates was the frequent power  
383 shortages. A recent study of 72 health facilities from all health districts in Sierra Leone  
384 found that only 13 (18%) of rural facilities were connected to the national power grid.  
385 The authors pointed out that digitization of healthcare facilities should consider the use  
386 of renewable energy sources (21). Digitalization of X-ray at low level of healthcare  
387 would certainly require promoting the use of sustainable back-up systems for  
388 electricity, such as new wind or solar power.

389 The use of digitized X-ray requires a change in clinical practices, which may be  
390 challenging, as highlighted during interviews. There is still limited use of and  
391 experience in electronic data systems for healthcare at DH and many clinicians prefer  
392 having a printed CXR to be filed with the patient's medical chart and carried during  
393 clinical rounds or shared with colleagues to discuss cases (22). It may indeed be  
394 challenging to incorporate a digitized tool requiring access to computers or tablets  
395 when patients' files are still paper based. Digitized X-ray can be printed but this adds  
396 an additional cost and potential logistical and affordability issues.

397 Even if digital related issues can be solved, structural problems that affect access to  
398 X-ray were commonly reported to explain the lack of d-CXR and raised by HCWs  
399 during interview. Breaking down of the radiography machine was the first cause of d-  
400 CXR not performed in the study. The lack of suitable maintenance system is a common  
401 problem in many resource-limited countries that rely often on private contractors at a  
402 high cost(23). This raises questions about the sustainability of such interventions and  
403 the need to empower the health facilities to address most common technical issues  
404 with a back-up system for more complex ones.

405 In conclusion, d-CXR implemented at district hospital level in resource limited countries  
406 can provide good quality of CXR and could contribute to better diagnosis of childhood  
407 tuberculosis. It require significant investment in terms of equipment, training,  
408 maintenance and supervision that may be difficult to maintain under routine conditions,  
409 and consecutively a strong stakeholder engagement and buy in to ensure its  
410 sustainability (24). Hopefully with the upcoming CAD systems and t development of  
411 portable X-ray machines and their inclusion in the budget forecast to international  
412 funders, we could expect an increased access to digital X-ray in high TB burden and  
413 resource limited countries in the coming years (25).

414 **ACKNOWLEDGEMENTS**

415 We thank members of the TB-Speed Scientific Advisory Board who gave technical  
416 advice on the design of the study and approved the protocol. We thank all the  
417 healthcare workers of the participating health facilities as well as all TB-Speed staff in  
418 the field who coordinated qualitative study and colleagues from the TB Speed  
419 Decentralization study. We also thanks the Ministries of Health and national TB  
420 programs (NTPs) of participating countries; and the NTP district representatives who  
421 supported the TB-Speed Decentralization Study implementation.

422

423 The funding of TB Speed Decentralization study was provided by Unitaid.

424 **Authors' contribution**

425 J Orne Gliemann (JOG) conceptualized the qualitative study, JOG, B Joshi (BJ) and  
426 O Marcy (OM) supervised the qualitative study in the different countries at the central  
427 level. BJ and DM Massom (DMM) performed formal qualitative analyses, E Leroy-  
428 Terquem (ELT), PY Norval (PYN), conceived the training course with technical support  
429 from OM. JV Taguebue (JVT), A Salomao (AS). D Bunnet (DB), T Chhen Eap (TCE),  
430 L Borand (LB), C Khosa CK), R Moh (RM), J Mwangi-Amumpere (JMA), M Tan Eang  
431 (MTE), I Manhiça (IM), E Wobudeya (EW) and A Mustapha (AM) coordinated the  
432 implementation of the study in the different countries. B Fortune Melingui (BFM)  
433 collected the data and performed the statistical quantitative analysis with support from  
434 S Beneteau (SB) and M Bonnet (MB). BFM wrote the first draft of the manuscript with  
435 support from JOG and MB. All authors reviewed and approved the final version of the  
436 manuscript.

437

438 **Declaration of interest**

439 We declare no competing interests.

440

441

442

443

444

445

446

447 **REFERENCES**

- 448 1. Global tuberculosis report 2023. Geneva: World Health Organization; 2023;  
449 available on [https://iris.who.int/bitstream/handle/10665/373828/9789240083851-](https://iris.who.int/bitstream/handle/10665/373828/9789240083851-eng.pdf?sequence=1)  
450 [eng.pdf?sequence=1](https://iris.who.int/bitstream/handle/10665/373828/9789240083851-eng.pdf?sequence=1). Accessed on 12.03.2024
- 451 2. Dodd PJ, Yuen CM, Sismanidis C, Seddon JA, Jenkins HE. The global burden of  
452 tuberculosis mortality in children: a mathematical modelling study. *Lancet Glob*  
453 *Health*. 2017; 5(9):898-906.
- 454 3. Marais BJ, Pai M. Specimen collection methods in the diagnosis of childhood  
455 tuberculosis. *Indian J Med Microbiol*. 2006; 24(4):249-51.
- 456 4. Vaezipour N, Fritschi N, Brasier N, B elard S, Dom nguez J, Tebruegge M, et al.  
457 Towards Accurate Point-of-Care Tests for Tuberculosis in Children. *Pathogens*.  
458 2022; 11(3):327
- 459 5. Wobudeya E, Bonnet M, Walters EG, Nabeta P, Song R, Murithi W, et al.  
460 Diagnostic Advances in Childhood Tuberculosis—Improving Specimen Collection  
461 and Yield of Microbiological Diagnosis for Intrathoracic Tuberculosis. *Pathogens*.  
462 2022; 11(4):389.
- 463 6. World Health Organization. Geneva. Chest radiography in tuberculosis detection:  
464 summary of current WHO recommendations and guidance on programmatic  
465 approaches. 2016. Available on  
466 [https://iris.who.int/bitstream/handle/10665/252424/9789241511506-](https://iris.who.int/bitstream/handle/10665/252424/9789241511506-eng.pdf?sequence=1&isAllowed=y)  
467 [eng.pdf?sequence=1&isAllowed=y](https://iris.who.int/bitstream/handle/10665/252424/9789241511506-eng.pdf?sequence=1&isAllowed=y). Accessed on 12.03.2024
- 468 7. Gunasekera KS, Marcy O, Mu oz J, Lopez-Varela E, Sekadde MP, Franke MF,  
469 et al. Development of treatment-decision algorithms for children evaluated for  
470 pulmonary tuberculosis: an individual participant data meta-analysis. *Lancet Child*  
471 *Adolesc Health*. 2023; 7(5):336-46.
- 472 8. Andronikou S, McHugh K, Abdurahman N, Khoury B, Mngomezulu V, Brant WE,  
473 et al. Paediatric radiology seen from Africa. Part I: providing diagnostic imaging to  
474 a young population. *Pediatr Radiol*. 2011; 41(7):811-25.
- 475 9. Graham SM. Chest radiography for diagnosis of tuberculosis in children: a  
476 problem of interpretation. *Int J Union Tuberc Lung Dis*.2014; 18(7):757.
- 477 10. Muyoyeta M, Kasese NC, Milimo D, Mushanga I, Ndhlovu M, Kapata N, et al.  
478 Digital CXR with computer aided diagnosis versus symptom screen to define  
479 presumptive tuberculosis among household contacts and impact on tuberculosis  
480 diagnosis. *BMC Infect Dis*.2017; 17(1):301.
- 481 11. Palmer M, Seddon JA, van der Zalm MM, Hesseling AC, Goussard P, Schaaf HS,  
482 et al. Optimising computer aided detection to identify intra-thoracic tuberculosis  
483 on chest x-ray in South African children. *PLOS Glob Public Health*. 2023;  
484 3(5):e0001799.



- 485 12. Eric Wobudeya et al. Effect of Decentralizing Childhood Tuberculosis Diagnosis  
486 to Primary Health Center and District Hospital Level - a Pre-Post Study in Six  
487 High Tuberculosis Incidence Countries. SSRN; 2023. Available on:  
488 <https://dx.doi.org/10.2139/ssrn.4583128>
- 489 13. B. F Melingui et al. Evaluation of a short training course of chest X-ray  
490 interpretation for the diagnosis of paediatric TB. Ingenta. Int J Tuberc Lung Dis 2024.  
491 Available on:  
492 [https://www.ingentaconnect.com/contentone/iatld/ijtldo/2024/00000001/00000002/ar](https://www.ingentaconnect.com/contentone/iatld/ijtldo/2024/00000001/00000002/art00004)  
493 [t00004](https://www.ingentaconnect.com/contentone/iatld/ijtldo/2024/00000001/00000002/art00004). Accessed on 12.03.2024
- 494 14. Eric Wobudeya. Availability and accessibility of TB diagnostic services for  
495 paediatric TB at the primary healthcare level: a multicountry survey. Int J Tuberc  
496 Lung Dis.2019.
- 497 15. O’Cathain A, Hoddinott P, Lewin S, Thomas KJ, Young B, Adamson J, et al.  
498 Maximising the impact of qualitative research in feasibility studies for randomised  
499 controlled trials: guidance for researchers. Pilot Feasibility Stud. 2015;1(1):32.
- 500 16. Joshi B, Lima YVD, Massom DM, Kaing S, Banga MF, Kamara ET, et al.  
501 Acceptability of decentralizing childhood tuberculosis diagnosis in low-income  
502 countries with high tuberculosis incidence: Experiences and perceptions from  
503 health care workers in Sub-Saharan Africa and South-East Asia. PLOS Glob  
504 Public Health. 2023; 3(10):e0001525.
- 505 17. The global Fund. Chest Radiography and Computer-aided Detection (CAD)  
506 Solutions for Tuberculosis Programs. 2021. available on:  
507 [https://www.theglobalfund.org/media/11374/operational\\_chest-radiography-cad-](https://www.theglobalfund.org/media/11374/operational_chest-radiography-cad-solutions-tb-programs_briefingnote_en.pdf)  
508 [solutions-tb-programs\\_briefingnote\\_en.pdf](https://www.theglobalfund.org/media/11374/operational_chest-radiography-cad-solutions-tb-programs_briefingnote_en.pdf). Accessed on 12.03.2024f
- 509 18. Kunz T, Lange B, Selzer A. [Digital public health: data protection and data  
510 security]. Bundesgesundheitsblatt Gesundheitsforschung Gesundheitsschutz.  
511 2020; 63(2):206-14.
- 512 19. Rajkumar SV, Sampathkumar P. Leaks of Clinical Trial Data and Research  
513 Integrity. Mayo Clin Proc. 2020; 95(7):1318-9.
- 514 20. Bani Issa W, Al Akour I, Ibrahim A, Almarzouqi A, Abbas S, Hisham F, et al.  
515 Privacy, confidentiality, security and patient safety concerns about electronic  
516 health records. Int Nurs Rev. 2020; 67(2):218-30.
- 517 21. Chukwu E, Garg L, Foday E, Konomanyi A, Wright R, Smart F. Electricity,  
518 Computing Hardware, and Internet Infrastructures in Health Facilities in Sierra  
519 Leone: Field Mapping Study. JMIR Med Inform. 2022; 10(2):e30040.
- 520 22. Yamey G. What are the barriers to scaling up health interventions in low and  
521 middle income countries? A qualitative study of academic leaders in  
522 implementation science. Glob Health.2012; 8:11.

- 523 23. Oleribe OO, Momoh J, Uzochukwu BS, Mbofana F, Adebisi A, Barbera T, et al.  
524 Identifying Key Challenges Facing Healthcare Systems In Africa And Potential  
525 Solutions. *Int J Gen Med.* 2019; 12:395-403.
- 526 24. Chelagat T, Kokwaro G, Onyango J, Rice J. Sustainability drivers and inhibitors  
527 for the health system performance improvement projects in selected health  
528 facilities in Kenya: a qualitative study. *BMJ Open.* 2021; 11(7):e035475.
- 529 25. World Health Organization 2021. Portable digital radiography system. 2021.  
530 Available on: <https://www.who.int/publications/i/item/9789240033818>. Accessed  
531 on 12.03.2024.
- 532

1 **Table 1:** Summary of the analytical approach

| Objectives                                               | Endpoints                                                          | Endpoint measures                                                                                                                                                                                                                                                                                 | Population                                                                   | Primary source of information               |
|----------------------------------------------------------|--------------------------------------------------------------------|---------------------------------------------------------------------------------------------------------------------------------------------------------------------------------------------------------------------------------------------------------------------------------------------------|------------------------------------------------------------------------------|---------------------------------------------|
| To describe the pre-intervention implementation of d-CXR | Baseline d-CXR capacity                                            | <ul style="list-style-type: none"> <li>- Availability of X-ray ward</li> <li>- Availability of analogic functional X-ray machine</li> <li>- Availability of digital X-ray</li> <li>- Availability of electricity</li> <li>- Number of radiographers available</li> </ul>                          |                                                                              | Pre-intervention site assessment report     |
|                                                          | Set-up of d-CXR                                                    | <ul style="list-style-type: none"> <li>- Logistic support</li> <li>- Provision of X-ray machine</li> <li>- Provision of DR plate and accessories</li> <li>- Number of radiographers trained</li> <li>- Provision in internet</li> </ul>                                                           |                                                                              | Country Implementation guide                |
| To assess the per-intervention implementation of d-CXR   | CXR performance uptake and interpretation by clinician at facility | <ul style="list-style-type: none"> <li>- Number of children with presumptive TB</li> <li>- Number of children with CXR performed</li> <li>- Number of CXR performed per child</li> <li>- Number of children with CXR attempts</li> </ul>                                                          | Children with presumptive TB enrolled in the TB-Speed decentralisation study | REDCap clinical Database                    |
|                                                          |                                                                    | <ul style="list-style-type: none"> <li>- Number of CXR attempts</li> <li>- Number and proportion of CXR performed</li> <li>- Number and proportion of good quality CXR</li> <li>- Number and proportion of interpreted CXR</li> </ul>                                                             | CXR attempts at district hospital level                                      | REDCap clinical Database                    |
|                                                          | Reasons for CXR not performed                                      | <ul style="list-style-type: none"> <li>- Technical problem with the X-ray machine</li> <li>- Problems of connectivity between with the DR plate</li> <li>- Electrical problems</li> <li>- Other technical problems</li> <li>- Absence of radiographer</li> <li>- Administrative issues</li> </ul> | CXR attempts without any CXR performed                                       | REDCap clinical Database                    |
|                                                          | d-CXR performance indicators                                       | <ul style="list-style-type: none"> <li>- Median score of d-CXRs performed as indicated</li> <li>- Median score of d-CXR loaded on/from the server as indicated</li> <li>- Median score of d-CXRs interpreted as indicated</li> </ul>                                                              | Supervisors                                                                  | REDCap database of site supervision reports |

|  |                                                                |                                                                                                                                                                                                                                                                             |                                                        |                                             |
|--|----------------------------------------------------------------|-----------------------------------------------------------------------------------------------------------------------------------------------------------------------------------------------------------------------------------------------------------------------------|--------------------------------------------------------|---------------------------------------------|
|  | d-CXR challenges and recommendations identified by supervisors | <ul style="list-style-type: none"> <li>- Loading of d-CXR</li> <li>- Technical problem with DR plates</li> <li>- Issues with internet connection</li> <li>- Delays in d-CXR interpretation</li> <li>- Quality issues</li> <li>- Dysfunction of the X-ray machine</li> </ul> | Supervisors                                            | REDCap database of site supervision reports |
|  | Perception of d-CXR by health care workers                     | Experience and views of health care workers regarding d-CXR                                                                                                                                                                                                                 | HCWs involved in diagnosis of tuberculosis in children | Semi-structured interviews                  |

2    PHC: Primary health Centre; DH: District Hospital; CXR: Chest X- ray; TB: Tuberculosis; HCW: Healthcare worker

3

4

5 **Table 2:** Baseline digital X-ray capacity and setup of digital X-ray per district hospital and country during pre-intervention implementation

| Countries    | District referral hospital | Baseline capacity          |                                                   |                               |                        |                                       | Set up of digital X-ray           |                          |                            |                                           |                                 |                       |
|--------------|----------------------------|----------------------------|---------------------------------------------------|-------------------------------|------------------------|---------------------------------------|-----------------------------------|--------------------------|----------------------------|-------------------------------------------|---------------------------------|-----------------------|
|              |                            | Availability of X-ray unit | Availability of analogic functional X-ray machine | Availability of digital X-ray | Electrical power issue | Number of radiographers in X-ray ward | Electricity provided by the study | Renovation of X-ray ward | Provision of X-ray machine | Provision of DR plate and its accessories | Number of radiographers trained | Provision of internet |
| Cambodia     | Batheay                    | Yes                        | Yes                                               | No                            | No                     | 2                                     | No                                | No                       | No                         | Yes                                       | 2                               | Yes                   |
|              | Angroka                    | Yes                        | Yes                                               | No                            | No                     | 2                                     | No                                | No                       | No                         | Yes                                       | 2                               | Yes                   |
| Cameroon     | Obala                      | Yes                        | Yes                                               | No                            | No                     | 2                                     | No                                | No                       | No                         | Yes                                       | 2                               | Yes                   |
|              | Bafia                      | Yes                        | Yes                                               | No                            | No                     | 2                                     | No                                | No                       | No                         | Yes                                       | 2                               | Yes                   |
| Ivory coast  | Sassandra                  | Yes                        | Yes                                               | No                            | Yes                    | 3                                     | No                                | No                       | No                         | Yes                                       | 2                               | Yes                   |
|              | Danane                     | Yes                        | Yes                                               | No                            | No                     | 5                                     | No                                | No                       | No                         | Yes                                       | 5                               | Yes                   |
| Mozambique   | Manjacaze                  | Yes                        | Yes                                               | No                            | No                     | 3                                     | No                                | No                       | No                         | Yes                                       | 2                               | Yes                   |
|              | Chokwe                     | Yes                        | Yes                                               | No                            | No                     | 2                                     | No                                | No                       | No                         | Yes                                       | 2                               | Yes                   |
| Sierra Leone | Bo                         | Yes                        | Yes                                               | Yes                           | Yes                    | 5                                     | No                                | No                       | No                         | No                                        | 5                               | Yes                   |
|              | Port Loko                  | Yes                        | Yes                                               | No                            | Yes                    | 2                                     | No                                | No                       | No                         | Yes                                       | 2                               | Yes                   |
| Uganda       | Rakai                      | No                         | No*                                               | No                            | Yes                    | 1                                     | No                                | Yes                      | Yes                        | Yes                                       | 1                               | Yes                   |
|              | Kanungu                    | No                         | No*                                               | No                            | Yes                    | 2                                     | No                                | Yes                      | Yes                        | Yes                                       | 2                               | Yes                   |

6 \* The machine was faulty and was last used 10 years back before TB-Speed intervention; CXR: chest X-ray

7

8

9

10 **Table 3:** Cascade of care of chest X-ray in district hospitals per country, health district and overall

11

| Countries    | Health District          | Children with presumptive TB | Children with CXR performed, n = 1780 |             |                    | Children with d-CXR attempt, n = 203 |            |                    | D-CXR attempts |                                       |                                             |                                         |
|--------------|--------------------------|------------------------------|---------------------------------------|-------------|--------------------|--------------------------------------|------------|--------------------|----------------|---------------------------------------|---------------------------------------------|-----------------------------------------|
|              |                          |                              | At least one                          | One         | Two                | Any                                  | One        | Two                | CXR attempts   | CXR performed n (%) <sup>(****)</sup> | CXR of good quality n (%) <sup>(****)</sup> | CXR interpreted n (%) <sup>(****)</sup> |
| Cambodia     | Batheay                  | 171                          | 171                                   | 170         | 1                  | 2                                    | 2          | 0                  | 174            | 172 (98.8)                            | 172 (100.0)                                 | 172 (100.0)                             |
|              | Angroka <sup>(*)</sup>   | 90                           | 37                                    | 37          | 0                  | 0                                    | 0          | 0                  | 37             | 37 (100.0)                            | 37 (100.0)                                  | 37 (100.0)                              |
| Cameroon     | Bafia                    | 303                          | 297                                   | 284         | 13                 | 7                                    | 6          | 1                  | 318            | 308 (96.5)                            | 306 (99.3)                                  | 306 (100.0)                             |
|              | Obala <sup>(*)</sup>     | 374                          | 207                                   | 199         | 8                  | 11                                   | 11         | 0                  | 226            | 215 (95.1)                            | 214 (99.5)                                  | 214 (100.0)                             |
| Ivory coast  | Sassandra                | 112                          | 92                                    | 86          | 6                  | 2                                    | 1          | 1                  | 101            | 100 (99.0)                            | 99 (99.0)                                   | 99 (100.0)                              |
|              | Danane <sup>(*)</sup>    | 321                          | 126                                   | 121         | 5                  | 1                                    | 1          | 0                  | 132            | 131 (99.2)                            | 131(100.0)                                  | 131 (100.0)                             |
| Mozambique   | Manjacaze                | 112                          | 108                                   | 56          | 52                 | 1                                    | 0          | 1                  | 162            | 161 (99.3)                            | 160(99.3)                                   | 160 (100.0)                             |
|              | Chokwe <sup>(*)</sup>    | 482                          | 102                                   | 66          | 37 <sup>(**)</sup> | 12                                   | 7          | 5 <sup>(***)</sup> | 159            | 139 (87.9)                            | 139(100.0)                                  | 139 (100.0)                             |
| Sierra Leone | Bo                       | 354                          | 323                                   | 321         | 1                  | 21                                   | 21         | 0                  | 344            | 324 (94.1)                            | 324(100.0)                                  | 324 (100.0)                             |
|              | Port Loko <sup>(*)</sup> | 53                           | 14                                    | 14          | 0                  | 36                                   | 17         | 20                 | 71             | 14 (19.7)                             | 14(100.0)                                   | 14 (100.0)                              |
| Uganda       | Rakai                    | 137                          | 22                                    | 17          | 5                  | 0                                    | 0          | 0                  | 27             | 27 (81.4)                             | 26(96.2)                                    | 26 (100.0)                              |
|              | Kanungu <sup>(*)</sup>   | 595                          | 143                                   | 134         | 9                  | 70                                   | 60         | 10                 | 232            | 152(71.0)                             | 151(99.3)                                   | 150 (99.3)                              |
|              | <b>Overall</b>           | <b>3104</b>                  | <b>1642</b>                           | <b>1505</b> | <b>137</b>         | <b>164</b>                           | <b>126</b> | <b>38</b>          | <b>1983</b>    | <b>1780 (89.7)</b>                    | <b>1773 (99.6)</b>                          | <b>1772 (99.9)</b>                      |

12

13 (\*): District in which the diagnostic package was decentralized at DH and PHC

14 (\*\*): A child had three CXR performed

15 (\*\*\*): A child had three CXR attempts and no d-CXR

16 (\*\*\*\*) The denominator corresponds to the number in the previous column

17 TB: Tuberculosis; CXR: Chest-X-Ray

18

19

20

21

22

23

24

25

26

27

28

29 **Table 4:** Median score results of the performance indicators from the site supervision visits in the district hospitals by country.

| <b>Characteristic</b>                                    | <b>Cambodia,<br/>N = 12</b> | <b>Cameroon,<br/>N = 9</b> | <b>Mozambique,<br/>N = 8</b> | <b>Sierra Leone,<br/>N = 12</b> | <b>Uganda,<br/>N = 5</b> | <b>Overall,<br/>N=46</b> |
|----------------------------------------------------------|-----------------------------|----------------------------|------------------------------|---------------------------------|--------------------------|--------------------------|
| d-CXR performed as indicated (/5)<br>Median (IQR)        | 5.0<br>(5.0-5.0)            | 5.0<br>(4.0-5.0)           | 1.0<br>(1.0-2.5)             | 5.0<br>(4.0-5.0)                | 4.0<br>(4.0-5.0)         | 4.5<br>(3.0, 5.0)        |
| d-CXR upload / downloaded as indicated (/5) Median (IQR) | 4.0<br>(4.0-5.0)            | 5.0<br>(4.0-5.0)           | 1.0<br>(1.0-1.0)             | 5.0<br>(4.5-5.0)                | 1.0<br>(1.0-2.7)         | 3.00<br>(1.0, 5.0)       |
| d-CXR interpreted as indicated(/5)<br>Median (IQR)       | 5.0<br>(5.0-5.0)            | 4.0<br>(4.0-5.0)           | 1.0<br>(1.0-3.5)             | 4.0<br>(3.5-5.0)                | 5.0<br>(4.0-5.0)         | 4.0<br>(3.0, 5.0)        |

30

31

32 **Table 5:** Reasons for digital chest X-ray not performed by country

33

|                                                                         | <b>Cambodia<br/>n=2</b> | <b>Cameroon<br/>n=19</b> | <b>Ivory coast<br/>n=4</b> | <b>Mozambique<br/>n=20</b> | <b>Sierra Leone<br/>n=78</b> | <b>Uganda<br/>n=80</b> | <b>Overall n (%)<br/>N=203</b> |
|-------------------------------------------------------------------------|-------------------------|--------------------------|----------------------------|----------------------------|------------------------------|------------------------|--------------------------------|
| Technical problem of the X-ray machine                                  | -                       | 17                       | 2                          | 20                         | 34                           | -                      | 73 (35.9)                      |
| Problem of connectivity between the DR plates detector and the computer | 2                       | 2                        | -                          | -                          |                              | 40                     | 44 (21.7)                      |
| Non-specified technical issues                                          | -                       | -                        | -                          | -                          | 34                           | 6                      | 40 (19.7)                      |
| Electrical power issues                                                 | -                       | -                        | 1                          | -                          | -                            | 29                     | 30 (14.8)                      |
| Absence of radiographer                                                 | -                       | -                        | -                          | -                          | 7                            | 5                      | 12 (5.9)                       |
| Administrative Issues                                                   | -                       | -                        | 1                          | -                          | 3                            | -                      | 4 (1.9)                        |

34

DR : Digital Radiography

35

36

37

38

39

40

41

42

43



44 **Supplementary file**

45 **List of Supplementary Tables**

46 **Table S1:** Sociodemographic information of HCWs interviewed, TB-Speed Decentralization study, N=113, 2021

47 **Table S2:** Challenges and recommendations identified from site supervision visits' reports

48

49

50 **Table S1:** Sociodemographic information of HCWs interviewed, TB-Speed Decentralization study, N=113, 2021

| Characteristic                 | Cambodia,<br>n = 17 | Cameroon,<br>n= 24 | Ivory coast,<br>n= 16 | Mozambique,<br>n = 19 | Sierra Leone,<br>n = 20 | Uganda,<br>n = 17 | Overall,<br>N = 113 |
|--------------------------------|---------------------|--------------------|-----------------------|-----------------------|-------------------------|-------------------|---------------------|
| Gender n(%)                    |                     |                    |                       |                       |                         |                   |                     |
| Female                         | 8 (47)              | 14 (58)            | 2 (12)                | 14 (74)               | 16 (80)                 | 10 (59)           | 64 (57)             |
| Male                           | 9 (53)              | 10 (42)            | 14 (88)               | 5 (26)                | 4 (20)                  | 7 (41)            | 49 (43)             |
| Position n (%)                 |                     |                    |                       |                       |                         |                   |                     |
| Medical doctor                 | 3 (18)              | 5 (21)             | 2 (12)                | 3 (16)                | 10 (50)                 | 2 (12)            | 25 (22)             |
| Midwife                        | 6 (35)              | 0 (0)              | 0 (0)                 | 0 (0)                 | 1 (5.0)                 | 0 (0)             | 7 (6.2)             |
| Nurse                          | 8 (47)              | 19 (79)            | 14 (88)               | 16 (84)               | 9 (45)                  | 13 (76)           | 79 (70)             |
| Radiographer                   | 0 (0)               | 0 (0)              | 0 (0)                 | 0 (0)                 | 0 (0)                   | 2 (12)            | 2 (1.8)             |
| Median Age (IQR)               | 33 (30, 48)         | 32 (30, 41)        | 36 (33, 38)           | 33 (28, 38)           | 36 (31, 42)             | 36 (33, 41)       | 35 (31, 41)         |
| Type of decentralization n (%) |                     |                    |                       |                       |                         |                   |                     |
| DH Focused                     | 8 (47)              | 13 (54)            | 9 (56)                | 10 (53)               | 10 (50)                 | 7 (41)            | 57 (50)             |
| PHC Focused                    | 9 (53)              | 11 (46)            | 7 (44)                | 9 (47)                | 10 (50)                 | 10 (59)           | 56 (50)             |
| Type of health facility n (%)  |                     |                    |                       |                       |                         |                   |                     |
| District hospital              | 6 (35)              | 6 (25)             | 3 (19)                | 5 (26)                | 6 (30)                  | 8 (47)            | 34 (30)             |
| Primary Health Centre          | 11 (65)             | 18 (75)            | 13 (81)               | 14 (74)               | 14 (70)                 | 9 (53)            | 79 (70)             |

51

52

53

54 **Table S2:** Challenges and recommendations identified from site supervision visits' reports

55

| <b>Main challenges observed during Site supervision visits</b> | <b>Site supervisors recommendations performed</b>                                                                                                                                                                            |
|----------------------------------------------------------------|------------------------------------------------------------------------------------------------------------------------------------------------------------------------------------------------------------------------------|
| Difficulties to upload and download d-CXR                      | <ul style="list-style-type: none"> <li>- Contact country study team for support</li> <li>- Train staff on the loading procedure</li> <li>- Share d-CXRs via social media system</li> </ul>                                   |
| Technical problems on DR plate                                 | <ul style="list-style-type: none"> <li>- Verify calibration the detector</li> <li>- Contact country study team for support</li> <li>- Performed non digitalized CXR</li> </ul>                                               |
| Difficulties with internet connexion                           | <ul style="list-style-type: none"> <li>- Contact country study team for support</li> </ul>                                                                                                                                   |
| Delay to interpretation of CXR                                 | <ul style="list-style-type: none"> <li>- Once the d-CXR is performed ,the radiographer must upload the CXRs images immediately on the international server</li> </ul>                                                        |
| Difficulty interpreting certain CXR                            | <ul style="list-style-type: none"> <li>- Performed collective reading and interpretation of d-CXR</li> <li>- Use social media system to exchange d-CXR for advice</li> <li>- Contact clinical mentors for support</li> </ul> |
| Bad quality of CXR when DR plate was unavailable               | <ul style="list-style-type: none"> <li>- Contact country study team for support</li> <li>-</li> </ul>                                                                                                                        |
| Dysfunction of the X-ray machine                               | <ul style="list-style-type: none"> <li>- Contact country study team for support</li> </ul>                                                                                                                                   |

56

CTU: Country Trial Unit; CXR: Chest-X-ray; DR: Digital Radiography
